# Supplementary material for: Indocyanine-Green-Loaded Liposomes for Photodynamic and Photothermal Therapies: Inducing Apoptosis and Ferroptosis in Cancer Cells with Implications beyond Oral Cancer
Source: MDPI journal article supplement (doi:10.3390/pharmaceutics16020224), 2024-02-04
Supplement: s1 [file s1]

## Supplementary Material

# Indocyanine-Green-Loaded Liposomes for Photodynamic and Photothermal Therapies: Inducing Apoptosis and Ferroptosis in Cancer Cells with Implications beyond Oral Cancer

Wei-Ting Liao <sup>1,2,†</sup>, Dao-Ming Chang <sup>3,†</sup>, Meng-Xian Lin <sup>1</sup>, Jeng-Woei Lee <sup>4</sup>, Yi-Chung Tung <sup>3,\*</sup> and Jong-Kai Hsiao <sup>1,2,\*</sup>

<sup>1</sup> Department of Medical Imaging, Taipei Tzu Chi General Hospital, Buddhist Tzu-Chi Medical Foundation, New Taipei City 23142, Taiwan; r05b42035@ntu.edu.tw (W.-T.L.); tch36363@tzuchi.com.tw (M.-X.L.)

<sup>2</sup> School of Medicine, Tzu Chi University, Hualien 97004, Taiwan

<sup>3</sup> Research Center for Applied Sciences, Academia Sinica, Taipei 11529, Taiwan; dmchang@gate.sinica.edu.tw

<sup>4</sup> Department of Biomedical Sciences and Engineering, Tzu Chi University, Hualien 97004, Taiwan; jwlee@mail.tcu.edu.tw

\* Correspondence: tungy@gate.sinica.edu.tw (Y.-C.T.); jongkai@tzuchi.com.tw (J.-K.H.);

Tel.: +886-2-2787-3138 or +886-2-2787-3162 (Y.-C.T.); +886-2-6628-9779 (ext. 61114) (J.-K.H.)

† These authors contributed equally to this work.

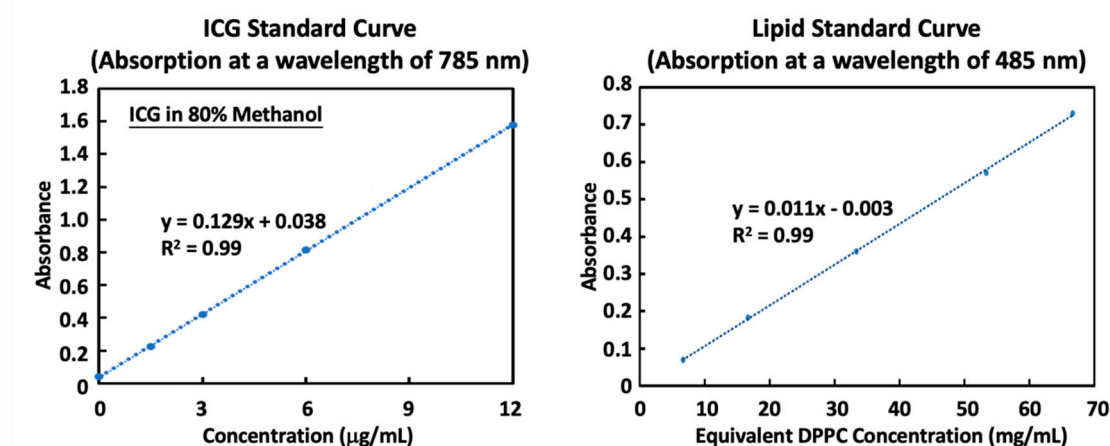

**Figure S1.** Standard curves for the measurements of ICG and lipid concentrations based on the optical absorbance.
